# Supplementary material for: Identification of Rare Recurrent Copy Number Variants in High-Risk Autism Families and Their Prevalence in a Large ASD Population
Source: PLoS One. 2013 Jan 14;8(1):e52239. doi: 10.1371/journal.pone.0052239 (PMC3544904; doi:10.1371/journal.pone.0052239)
Supplement: File S1 — Supplemental data Tables S1–S4. Table S1. TaqMan assays used for CNV confirmation. Genomic coordinates and assay names for all TaqMan assays used for CNV confirmation. All coordinates are shown using hg19 coordinates. Table S2. CNVs identified in Utah ASD families. The chromosomal locations and copy number status of all CNVs identified in Utah ASD families are shown. If CNVs had been observed in previous studies, the references are given below the table. Table S3. Literature CNVs. Chromosomal coordinates (hg19), source, and probe coverage on the custom Illumina array for each literature CNV characterized in this study. Table S4. CNVs identified using probes for sequence variants identified in Utah ASD families. Chromosome coordinates, TaqMan validation status, and copy number status for all CNVs identified using probes to sequence variants identified in Utah ASD families are shown. For one CNV the single TaqMan assay that was used failed PCR quality control. (XLSX) [file pone.0052239.s001.xlsx]

## Sheet: Table S1 TaqMan Assays
TaqMan Assays Used for CNV Validation
Chromosome	Start Coord. (hg19)	End Coord. (hg19)	Assay Name
chr1	145608130	145608131	Hs01960835_cn
chr1	145714157	145714158	Hs03356306
chr1	145727743	145727744	Hs02151880
chr1	145831706	145831707	Hs03363224_cn
chr1	215857628	215857629	Hs06533545_cn
chr1	215860518	215860519	Hs05788384_cn
chr2	13206303	13206304	Hs05832292_cn
chr2	51257082	51257083	Hs04675592_cn
chr2	51273782	51273783	Hs03406712_cn
chr2	51335043	51335044	Hs03207855_cn
chr2	78417269	78417270	Hs03210777
chr2	78448009	78448010	Hs03219183
chr3	1940242	1940243	Hs03449476_cn
chr3	74559838	74559839	Hs06657187_cn
chr3	74570239	74570240	Hs03006662_cn
chr3	74580064	74580065	Hs06656853_cn
chr3	172593661	172593662	Hs05888850_cn
chr3	172600469	172600470	Hs04760981_cn
chr3	174853869	174853870	Hs03492315_cn
chr3	174889051	174889052	Hs03463132_cn
chr3	176765106	176765107	Hs00705847
chr3	176773900	176773901	Hs06653638
chr3	178962631	178962632	Hs04718548_cn
chr3	178969356	178969357	Hs00989875_cn
chr4	73785471	73785472	Hs04844255_cn
chr4	73923259	73923260	Hs02916212_cn
chr4	74027025	74027026	Hs00308217_cn
chr4	189089063	189089064	Hs03238737
chr4	189109145	189109146	Hs03244159
chr5	99647650	99647651	Hs03245981_cn
chr5	99665469	99665470	Hs03248003_cn
chr5	118544341	118544342	Hs06046822_cn
chr5	118567989	118567990	Hs03578408_cn
chr5	118606921	118606922	Hs03562094_cn
chr6	7464166	7464167	Hs03258806_cn
chr6	7467367	7467368	Hs03261355_cn
chr6	39070306	39070307	Hs06797005_cn
chr6	44131202	44131203	Hs06765368_cn
chr6	49257472	49257473	Hs06135362_cn
chr6	62432331	62432332	Hs06740361_cn
chr6	62468865	62468866	Hs06752297_cn
chr6	127449047	127449048	Hs04898996
chr6	127467261	127467262	Hs06149095
chr6	147599263	147599264	Hs00462911_cn
chr6	147649513	147649514	Hs06799063_cn
chr6	147681914	147681915	Hs04903013_cn
chr7	6870706	6870707	Hs03632408_cn
chr7	15383278	15383279	CusTaq1CX6RM14_cn
chr7	15405201	15405202	ContR26CX0IV8W_cn
chr7	93080844	93080845	Hs04974410_cn
chr7	93145475	93145476	Hs04971099_cn
chr7	93152478	93152479	Hs04944233_cn
chr7	100232257	100232258	Hs03629609
chr7	100304948	100304949	Hs01981045
chr7	100381692	100381693	Hs05013769
chr7	124527535	124527536	Hs03620793_cn
chr7	124578724	124578725	Hs03650226_cn
chr7	149504056	149504057	Hs03630536
chr7	149528561	149528562	Hs03645125
chr7	149550437	149550438	Hs03640597
chr8	3165293	3165294	Hs02622320_cn
chr8	54865516	54865517	Hs03668894_cn
chr8	54905347	54905348	Hs03694907_cn
chr8	84323860	84323861	Hs04360657
chr8	84331501	84331502	Hs03658852
chr8	85298919	85298920	Hs03668441_cn
chr8	85303238	85303239	Hs03678663_cn
chr8	86467253	86467254	Hs03673176_cn
chr9	28203352	28203353	Hs03707922_cn
chr9	28266812	28266813	Hs03714527_cn
chr9	28333835	28333836	Hs03725541_cn
chr9	28354528	28354529	Hs03723870_cn
chr9	136523906	136523907	Hs01617069_cn
chr9	136527743	136527744	Hs06869845_cn
chr9	139091261	139091262	Hs06889516_cn
chr9	139101729	139101730	Hs06847090
chr9	139110612	139110613	Hs00495475
chr10	83887149	83887150	Hs03726621_cn
chr10	89717970	89717971	Hs05212456
chr10	92274027	92274028	Hs03746257
chr10	92287873	92287874	Hs03740287
chr12	53178157	53178158	Hs06965067_cn
chr12	53181253	53181254	Hs06930722_cn
chr12	71934616	71934617	Hs06933395_cn
chr12	71950419	71950420	Hs01107784_cn
chr12	73071721	73071722	Hs06996317_cn
chr12	73094916	73094917	Hs03093848_cn
chr12	80898972	80898973	Hs03825941_cn
chr12	80974071	80974072	Hs03820308_cn
chr12	81007496	81007497	Hs03818167_cn
chr12	81610738	81610739	Hs00229436_cn
chr12	81693094	81693095	Hs00586334_cn
chr12	81746602	81746603	Hs06985491_cn
chr12	102097529	102097530	Hs06981209_cn
chr12	102105668	102105669	Hs04412303_cn
chr13	40089549	40089550	Hs03853267_cn
chr13	93444276	93444277	Hs04432382
chr13	93460071	93460072	Hs04432043
chr14	24519089	24519090	Hs03883350
chr14	24534221	24534222	Hs01939905
chr14	28522635	28522636	CusTaq2CXLJH4P_cn
chr14	37916895	37916896	Hs07055190_cn
chr14	37977977	37977978	Hs07044926_cn
chr14	38014166	38014167	Hs07086625_cn
chr14	38021288	38021289	Hs07075472_cn
chr14	96763309	96763310	Hs05318569_cn
chr14	96772014	96772015	Hs00982344_cn
chr14	99641385	99641386	Hs00596122_cn
chr14	100734909	100734910	Hs03875129
chr14	100765197	100765198	Hs01931607
chr14	100795059	100795060	Hs00201515
chr14	101000582	101000583	Hs03874127_cn
chr14	101005643	101005644	Hs01983727_cn
chr14	102021598	102021599	Hs03877829_cn
chr14	102025461	102025462	Hs03890390_cn
chr14	102737644	102737645	Hs04443274_cn
chr14	102744822	102744823	Hs04436664_cn
chr14	102974514	102974515	Hs03874565_cn
chr14	104035624	104035625	Hs07076467
chr14	104089093	104089094	Hs07094555
chr14	104134199	104134200	Hs07101222
chr15	20194087	20194088	Hs04444017
chr15	25578159	25578160	Hs03899505_cn
chr15	25580751	25580752	CusTaq3CX20SJR_cn
chr15	25739587	25739588	Hs03895201_cn
chr15	26170697	26170698	Hs03899220_cn
chr15	26218978	26218979	Hs07535627_cn
chr15	26566910	26566911	Hs05379477_cn
chr15	26758634	26758635	Hs05357961_cn
chr15	27186676	27186677	Hs05354636_cn
chr15	27215751	27215752	Hs05352889_cn
chr15	28430324	28430325	Hs03904620_cn
chr15	28464592	28464593	Hs03900299_cn
chr15	28510861	28510862	Hs00790698_cn
chr15	30008107	30008108	Hs03905821_cn
chr15	30028029	30028030	Hs03894282_cn
chr15	31233791	31233792	Hs01761674_cn
chr15	31418708	31418709	Hs03907602_cn
chr15	31523604	31523605	Hs05345027_cn
chr15	31779480	31779481	Hs01740084_cn
chr15	31792000	31792001	Hs03903842
chr15	31807369	31807370	Hs03898720
chr15	31819397	31819398	Hs01183107_cn
chr15	40565562	40565563	Hs01801490_cn
chr15	40569495	40569496	Hs03050146_cn
chr15	40574016	40574017	Hs03915257
chr15	40600033	40600034	Hs02747689
chr15	40631492	40631493	Hs05348776
chr15	42140352	42140353	Hs01736986_cn
chr15	42220283	42220284	Hs05327333_cn
chr15	42278083	42278084	Hs07457532_cn
chr15	56246674	56246675	Hs05388304_cn
chr15	56258673	56258674	Hs02776763_cn
chr16	2137638	2137639	Hs03948922_cn
chr16	2139578	2139579	Hs01690407_cn
chr16	83908973	83908974	Hs03924139_cn
chr16	83927884	83927885	Hs03920294_cn
chr17	14133533	14133534	Hs05489546_cn
chr17	15285417	15285418	Hs05479141_cn
chr19	23823676	23823677	Hs07158898_cn
chr19	23847358	23847359	Hs07130588_cn
chr19	43260846	43260847	Hs04483050_cn
chr19	52919934	52919935	Hs01762991_cn
chr19	52961357	52961358	Hs04015789_cn
chr20	8654182	8654183	Hs07182273_cn
chr20	8655323	8655324	Hs07214628_cn
chr20	8656129	8656130	Hs07196671
chr20	8662295	8662296	Hs07181996
chr20	32267585	32267586	Hs03035919
chr20	32324773	32324774	Hs04040566
chr20	32380921	32380922	Hs07167677
chr20	35244629	35244630	Hs07189989_cn
chr20	35286976	35286977	Hs07187468
chr20	35339976	35339977	Hs07195828
chr20	35392781	35392782	Hs07216584
chr20	57246270	57246271	Hs00451592_cn
chr20	57276159	57276160	Hs02247879_cn
chr20	57283659	57283660	Hs07195366_cn
chrX	140316814	140316815	Hs04119700_cn
chrX	140348402	140348403	Hs04105155_cn
chrX	140394910	140394911	Hs04123806_cn
chrX	140450224	140450225	Hs04514589_cn
chrX	140560608	140560609	Hs04117605_cn
chrX	140711967	140711968	Hs04108237
chrX	140730389	140730390	Hs04114029
chrX	147283785	147283786	Hs05619718
chrX	147557625	147557626	Hs05666138
chrX	147831902	147831903	Hs05592380
chrX	148101715	148101716	Hs05606186
chrX	148379988	148379989	Hs05667154
chrX	148892085	148892086	Hs04109160_cn
chrX	148999489	148999490	Hs04513800_cn
chrX	149014384	149014385	Hs02798232_cn
chrX	153195418	153195419	Hs02879994_cn
chrX	153200970	153200971	Hs01730847_cn

## Sheet: Table S2 Utah Family CNVs
Chromosome	Start (hg19)	End (hg19)	ACRD Published?	Reference	Gain/Loss	Size (bp)	Gene	Custom iSelect Array Probes	Comments
chr1	4737693	4746636	N		Loss	8943	AJAP1	20
chr1	10624023	10627542	N		Loss	3519	PEX14	14
chr1	145714421	146101228	N		Gain	386807	more than 10 genes	20
chr1	169704308	169732211	N		Loss	27903	C1orf112	20
chr1	179456385	179472635	N		Loss	16250	C1orf125/DKFZp434N1720	20
chr1	204193679	204209979	N		Loss	16300	PLEKHA6	20
chr1	215858193	215861879	Y	4	Loss	3686	USH2A	19
chr1	225508461	225511454	N		Loss	2993	DNAH14	14
chr1	228848896	228853665	N		Loss	4769	5' of RHOU	11
chr1	237993724	237995299	N		Loss	1575	RYR2	15
chr1	243860912	243861049	N		Loss	137	AKT3	10
chr2	12685369	12693172	N		Loss	7803	AK001558	16
chr2	32982548	33050816	Y	2,5	Gain	68268	TTC27, AK095182	15
chr2	37904904	37909117	N		Gain	4213	5' of CDC42EP3	19
chr2	45997209	45997519	N		Loss	310	PRKCE	11
chr2	51272055	51336043	Y	2,4	Loss	63988	5' of NRXN1 (10 kb)	83	includes overlapping literature CNVs
chr2	52420563	52584090	N		Loss	163527	5' of NRXN1 (1 Mb)	20
chr2	58346718	58349248	Y	2	Loss	2530	VRK2	12
chr2	62195814	62230970	N		Loss	35156	COMMD1, CR603473	20
chr2	75014711	75044204	N		Loss	29493	5' of HK2	20
chr2	79330766	79342811	N		Gain	12045	5' of REG1B, 5' of REG1A	17
chr2	120130796	120145728	N		Loss	14932	5' of C2orf76, 5' of TMEM37	20
chr2	236424336	236465062	N		Loss	40726	AGAP1	20
chr3	6724453	7046515	N		Gain	322062	AF279782, GRM7	20
chr3	12387768	12393125	N		Loss	5357	PPARG	20
chr3	21731567	21734331	N		Gain	2764	ZNF385D	14
chr3	57051604	57053353	N		Gain	1749	ARHGEF3	13
chr3	60774451	60777932	Y	3	Gain	3481	FHIT	16
chr3	63962828	63964474	N		Loss	1646	ATXN7	13
chr3	74566042	74584605	N		Loss	18563	CNTN3	20
chr3	171090367	171092891	N		Gain	2524	TNIK	16
chr3	172596081	172617355	N		Gain	21274	SPATA16	20
chr4	58811798	58816810	N		Loss	5012	3' of BC034799 (480 kb)	14
chr4	80865807	80887173	N		Loss	21366	ANTXR2/DKFZp667K1925	17
chr4	101551216	101616281	N		Loss	65065	5' of EMCN (200 kb)	20
chr4	134924034	135188390	N		Loss	264356	PABPC4L	20
chr4	185734577	185740215	N		Loss	5638	ACSL1	18
chr4	189084983	189117429	N		Loss	32446	3' of TRIML1	20
chr5	20436884	20449034	N		Loss	12150	CDH18	20
chr5	58469036	58470270	N		Loss	1234	PDE4D	12
chr5	99634772	99682698	N		Loss	47926	5' of FAM174A (190 kb)	20
chr5	132621489	132630849	Y	2,4	Gain	9360	FSTL4	20
chr5	142599442	142602063	N		Loss	2621	ARHGAP26/KIAA0621	14
chr5	151582812	151583410	N		Loss	598	AK001582	12
chr6	7425246	7464367	N		Gain	39121	3' of RIOK1	20
chr6	10856101	10872458	N		Loss	16357	3' of TMEM14B and GCM2, 5' of MAK and SYCP2L	20
chr6	42126761	42128299	N		Loss	1538	GUCA1A	16
chr6	44113916	44180221	N		Loss	66305	CAPN11, TMEM63B	20
chr6	47864831	49244526	N		Loss	1379695	C6orf138	25
chr6	53856580	53864523	N		Loss	7943	AK056584	19
chr6	62443739	62462295	N		Loss	18556	KHDRBS2	17
chr6	119419595	119427038	Y	2	Loss	7443	FAM184A	18
chr6	123893763	123897553	N		Loss	3790	TRDN	14
chr6	139985775	140128887	N		Gain	143112	BC039503	20
chr6	147588752	147664671	Y	2	Gain	75919	STXBP5	20
chr6	161189018	161218651	N		Loss	29633	3' of PLG	20
chr7	6838712	6864071	N		Loss	25359	C7orf28B	15
chr7	11782637	11783917	Y	4	Loss	1280	THSD7A	12
chr7	13962113	13962620	Y	2	Loss	507	ETV1	11
chr7	71597328	71603027	N		Gain	5699	CALN1	14
chr7	105285949	105321353	N		Loss	35404	ATXN7L1	20
chr7	124546250	124580202	Y	4	Loss	33952	POT1, hypothetical proteins	20
chr8	3160739	3160885	N		Loss	146	CSMD1/KIAA1890	10
chr8	3169351	3169808	N		Loss	457	CSMD1/KIAA1890	11
chr8	3479586	3480400	N		Loss	814	CSMD1	12
chr8	4907673	4911422	N		Loss	3749	5' of CSMD1 60 kb)	20
chr8	31977229	31989597	N		Loss	12368	NRG1	20
chr8	52261992	52265315	N		Loss	3323	PXDNL	15
chr8	84323466	84337983	N		Loss	14517	3' of BC038578	20
chr8	85281895	85304198	N		Loss	22303	RALYL	20
chr8	86471729	86553130	N		Gain	81401	3' of REXO1L1	20
chr8	100402969	100406592	N		Loss	3623	VPS13B	10
chr9	7036350	7051859	N		Loss	15509	JMJD2C	20
chr9	28027694	28039222	N		Gain	11528	LINGO2	20
chr9	28190069	28347679	N		Loss	157610	LINGO2	20
chr9	75206337	75207666	N		Gain	1329	TMC1	11
chr9	116468123	116631674	N		Gain	163551	5' of ZNF618 (5 kb)	12
chr9	139083019	139113146	N		Gain	30127	LHX3, QSOX2	20
chr10	27361202	27381349	N		Loss	20147	ANKRD26	20
chr10	33217225	33222978	N		Loss	5753	ITGB1	11
chr10	38914665	42953131	N		Loss	4038466	AK131313, BC039000	20
chr10	52133698	52232708	Y	3	Gain	99010	SGMS1/SMS1	20
chr10	60793303	60857532	Y	3	Gain	64229	5' of PHYHIPL (80 kb)	20
chr10	68350062	68375800	N		Loss	25738	CTNNA3	20
chr10	81032555	81037800	N		Loss	5245	ZMIZ1	14
chr10	83893626	84175018	N		Loss	281392	NRG3	13
chr10	86939018	86970632	N		Loss	31614	AK097624	20
chr10	89720106	89723874	N		Loss	3768	PTEN	12
chr10	91210650	91217984	N		Loss	7334	SLC16A12	19
chr10	92274764	92289762	Y	2	Loss	14998	3' of BC037970	15
chr11	7488341	7489819	N		Gain	1478	SYT9, AK128569	16
chr11	12002139	12007077	N		Gain	4938	DKK3	20
chr11	12374189	12374712	N		Loss	523	MICALCL	11
chr11	16569019	16576640	N		Loss	7621	SOX6/DKFZp434N1217	12
chr11	31000774	31000929	N		Gain	155	DCDC5/KIAA1493	10
chr11	60228735	60229382	N		Loss	647	MS4A1	11
chr11	98148399	98212796	N		Gain	64397	5' of CNTN5 (700 kb)	20
chr11	100817655	100820663	N		Loss	3008	FLJ32810	14
chr11	131405729	131406206	N		Gain	477	NTM, AK128059	11
chr12	60173356	60173878	Y	4	Gain	522	SLC16A7/MCT2	13
chr12	73062598	73088289	Y	2	Loss	25691	3' of TRHDE	20
chr12	75547922	75572356	N		Loss	24434	KCNC2	20
chr12	80880491	80895554	N		Loss	15063	PTPRQ	20
chr12	80988331	81019079	N		Loss	30748	PTPRQ	20
chr12	81618586	81626675	N		Loss	8089	ACSS3	17
chr12	97870273	97875696	N		Loss	5423	NCRMS/AK056164	20
chr12	102097012	102106306	N		Loss	9294	CHPT1	13
chr12	127308503	127315005	Y, small overlap	4	Loss	6502	between BC069215 and BC037858	19
chr13	40087689	40088007	N		Loss	318	LHFP	12
chr13	49284461	49343043	N		Gain	58582	3' of CYSLTR2	20
chr13	50163809	50179454	N		Loss	15645	5' of RCBTB1	17
chr13	93448487	93461603	N		Loss	13116	GPC5	17
chr13	94357235	94369759	N		Loss	12524	GPC6	20
chr14	23862374	23888040	N		Loss	25666	MYH6, MYH7, MIR208B	20
chr14	28506099	28520243	N		Loss	14144	between BC148262 and CR597916	20
chr14	32904231	32909169	N		Gain	4938	AKAP6	20
chr14	33859159	33860185	N		Gain	1026	NPAS3	11
chr14	37928753	37948391	N		Loss	19638	MIPOL1	15
chr14	68068610	68071772	N		Loss	3162	5' of PIGH	15
chr15	33605301	33617521	N		Gain	12220	RYR3	20
chr15	47518807	47527672	N		Loss	8865	SEMA6D	16
chr15	58851369	58853307	N		Gain	1938	LIPC	14
chr15	60074956	60103803	Y	5	Loss	28847	5' of BNIP2 (90 kb)	20
chr15	66521832	66524433	N		Loss	2601	MEGF11	17
chr15	87830530	87870489	N		Loss	39959	between AGBL1, and TMEM83, NTRK3	20
chr16	16245729	16256767	N		Loss	11038	ABCC6, MRP6	34	includes overlapping literature CNVs
chr16	21363810	21602618	N		Loss	238808	More than 10 genes	25
chr16	82446255	82711504	Y	5	Gain	265249	CDH13	24
chr16	83909041	83926368	N		Loss	17327	5' of MLYCD, 3' of HSBP1	20
chr17	4007594	4324408	Y	4	Gain	316814	ZZEF1, KIAA0399, CYB5D2, ANKFY1, UBE2G1, SPNS3	20
chr17	21556170	25363654	N		Loss	3807484	BC070367, FAM27L, BC039120, CR592140, CR592128	20	much of this region spans the centromere and is heterochromatic
chr17	39211908	39221312	N		Loss	9404	KRTAP2-4	15
chr17	64258845	64259329	N		Loss	484	5' of APOH and 5' of PRKCA	11
chr18	30037470	30037675	N		Loss	205	FAM59A	10
chr20	4234781	4238447	N		Gain	3666	5' of ADRA1D	16
chr20	6013320	6017259	N		Loss	3939	CRLS1/DKFZp762C112	14
chr20	15755244	15765167	N		Loss	9923	MACROD2	20
chr20	47337049	47341312	N		Gain	4263	PREX1	14
chr20	49132410	49132637	N		Loss	227	PTPN1	10
chr20	56248075	56252910	N		Loss	4835	PMEPA1	20
chr21	17311697	17435462	N		Loss	123765	5' of C21orf34, 3' of USP25	20
chr21	42855515	42855647	Y	1	Gain	132	TMPRSS2	10
chr22	30731066	30731540	N		Gain	474	SF3A1	10
chr22	33459104	33470309	N		Loss	11205	5' of SYN3	20
chr22	39515118	39525791	N		Loss	10673	3' of APOBEC3H, 3' of CBX7	20
chr22	44251958	44257056	N		Loss	5098	SULT4A1/SULTX3	19
chr22	44641315	44641594	N		Gain	279	KIAA1644	10
chr22	51055900	51234443	Y	4	Gain	178543	ARSA, SHANK3, BC050343, ACR, MGC70863, RABL2B	10
chrX	3206732	3216695	N		Loss	9963	3' of MXRA5, ARSF	19
chrX	57285994	57291268	N		Gain	5274	5' of FAAH2	11
chrX	133460586	133466162	N		Loss	5576	5' of PHF6	11
chrX	142769032	142781735	N		Loss	12703	5' of SLITRK4, 3' of SPANXN2	15
chrX	151041009	151042244	N		Loss	1235	5' of MAGEA4	12
References:								Total = 2,642 Probes
1. Jaquemont et al., 2006
2. AGP, 2007
3. Sebat et al., 2007
4. Marshall et al., 2008
5. Christian et al., 2008

## Sheet: Table S3 Literature CNVs
CNV Regions (hg19, GRCh37)	CNV Origin -CHOP -Literature	Custom iSelect Array Probes
chr1:146626687-146641912	CHOP_CNV	208
chr1:146644352-146646782	CHOP_CNV	208
chr1:146649431-146651526	CHOP_CNV	208
chr1:146655885-146661221	CHOP_CNV	208
chr1:146714336-146767441	CHOP_CNV	208
chr1:147013183-147042947	CHOP_CNV	208
chr1:147119170-147142612	CHOP_CNV	208
chr1:147191843-147211176	CHOP_CNV	208
chr1:147228333-147245482	CHOP_CNV	208
chr1:152538131-152539246	CHOP_CNV	22
chr1:152551861-152552978	CHOP_CNV	22
chr1:176233934-176277050	CHOP_CNV	20
chr2:13202218-13248445	CHOP_CNV	20
chr2:37208154-37311483	CHOP_CNV	20
chr2:50147489-51240182	CHOP_CNV	84
chr2:51267143-51294094	CHOP_CNV	62
chr2:78414693-78457739	CHOP_CNV	20
chr2:99858712-99871568	CHOP_CNV	17
chr2:237821591-237832364	CHOP_CNV	94
chr3:1940192-1940920	CHOP_CNV	10
chr3:2573150-2573529	CHOP_CNV	11
chr3:4224733-4261302	CHOP_CNV	20
chr3:31702318-32023236	CHOP_CNV	20
chr3:37903670-38025958	CHOP_CNV	20
chr3:121343502-121387782	CHOP_CNV	20
chr3:172231370-173116242	CHOP_CNV	116
chr3:173116245-173254086	CHOP_CNV	100
chr3:173271686-173289279	CHOP_CNV	100
chr3:174001117-174885989	CHOP_CNV	100
chr4:13656804-13932850	CHOP_CNV	20
chr4:73756500-73905356	CHOP_CNV	60
chr4:73920417-73935470	CHOP_CNV	60
chr4:73940504-74124500	CHOP_CNV	60
chr4:144627954-144635127	CHOP_CNV	11
chr5:118229547-118343923	CHOP_CNV	100
chr5:118407187-118469872	CHOP_CNV	100
chr5:118478541-118584821	CHOP_CNV	100
chr5:118604420-118730292	CHOP_CNV	100
chr5:118730295-118856171	CHOP_CNV	100
chr6:39071841-39082863	CHOP_CNV	20
chr6:69235102-69237305	CHOP_CNV	10
chr6:122793063-123047516	CHOP_CNV	34
chr6:127440049-127518908	CHOP_CNV	20
chr6:135818945-136037191	CHOP_CNV	20
chr6:162664588-162667009	CHOP_CNV	31
chr6:168349013-168596249	CHOP_CNV	20
chr7:2649899-2654358	CHOP_CNV	20
chr7:32700564-32804186	CHOP_CNV	20
chr7:69064321-70257852	CHOP_CNV	23
chr7:111502940-111846460	CHOP_CNV	20
chr7:141695680-141806545	CHOP_CNV	20
chr8:43646415-43657436	CHOP_CNV	20
chr8:54858496-54907579	CHOP_CNV	20
chr9:116111824-116132133	CHOP_CNV	86
chr9:116135700-116139257	CHOP_CNV	85
chr9:119187508-120177315	CHOP_CNV	58
chr9:136501486-136524464	CHOP_CNV	37
chr10:87359313-87944322	CHOP_CNV	105
chr10:87951688-87959047	CHOP_CNV	79
chr10:88126251-88893189	CHOP_CNV	104
chr10:105353785-105615162	CHOP_CNV	20
chr10:118350491-118368684	CHOP_CNV	20
chr12:31409581-31410819	CHOP_CNV	13
chr12:53183470-53189890	CHOP_CNV	20
chr12:57345220-57352101	CHOP_CNV	20
chr12:71833814-71980084	CHOP_CNV	20
chr13:20977807-21100010	CHOP_CNV	20
chr14:94184645-94254764	CHOP_CNV	20
chr15:23686020-23692388	CHOP_CNV	19
chr15:24842742-24979665	CHOP_CNV	47
chr15:25101701-25223727	CHOP_CNV	53
chr16:16243423-16317335	CHOP_CNV	40
chr16:47276822-47330242	CHOP_CNV	20
chr16:70954495-71007921	CHOP_CNV	20
chr16:75572016-75590168	CHOP_CNV	20
chr16:84599210-84610700	CHOP_CNV	40
chr17:30819629-31203900	CHOP_CNV	20
chr17:64298927-64806860	CHOP_CNV	31
chr18:3498838-3880133	CHOP_CNV	20
chr19:22639351-22639555	CHOP_CNV	10
chr19:23835709-23870015	CHOP_CNV	38
chr19:23926161-23941637	CHOP_CNV	38
chr19:43225795-43440224	CHOP_CNV	20
chr19:52880583-52901119	CHOP_CNV	108
chr19:52901122-52909308	CHOP_CNV	108
chr19:52909311-52921656	CHOP_CNV	108
chr19:52932442-52934660	CHOP_CNV	108
chr19:52934663-52942694	CHOP_CNV	108
chr19:52956761-52961405	CHOP_CNV	108
chr20:8113297-8865545	CHOP_CNV	40
chr20:55993557-55997466	CHOP_CNV	33
chr22:21021266-21028944	CHOP_CNV	19
chr22:29999566-30094583	CHOP_CNV	20
chrX:6966962-7066187	CHOP_CNV	20
chrX:139998330-140335594	CHOP_CNV	71
chrX:140335597-140443613	CHOP_CNV	71
chrX:140590844-140672859	CHOP_CNV	71
chrX:140677836-140678897	CHOP_CNV	71
chrX:140713997-140714859	CHOP_CNV	71
chrX:148663310-148669114	CHOP_CNV	60
chrX:148676928-148678215	CHOP_CNV	60
chrX:148678218-148713566	CHOP_CNV	60
chrX:148858522-149097275	CHOP_CNV	60
chrX:154719774-154842595	CHOP_CNV	40
chr1:110230419-110236364	Literature_CNV	0
chr1:146555186-147779086	Literature_CNV	152
chr1:162573378-167543374	Literature_CNV	61
chr1:230111830-232145817	Literature_CNV	43
chr2:54076-1198908	Literature_CNV	23
chr2:17406571-18378433	Literature_CNV	21
chr2:32678416-33378738	Literature_CNV	40
chr2:45455651-45984915	Literature_CNV	31
chr2:50145644-51259671	Literature_CNV	84
chr2:51979551-52401447	Literature_CNV	40
chr2:57200002-61699998	Literature_CNV	98
chr2:62258231-63028717	Literature_CNV	48
chr2:115139568-115617934	Literature_CNV	20
chr2:162387215-162840241	Literature_CNV	20
chr2:198797484-209741388	Literature_CNV	119
chr2:236632457-238435065	Literature_CNV	101
chr2:238435068-242985349	Literature_CNV	125
chr3:2028902-2884398	Literature_CNV	31
chr3:11034422-11080933	Literature_CNV	20
chr3:67656832-68957204	Literature_CNV	24
chr3:100203669-100487283	Literature_CNV	20
chr3:143608410-144494785	Literature_CNV	20
chr3:195674002-197284998	Literature_CNV	27
chr4:154087652-172339893	Literature_CNV	191
chr5:176990003-180905258	Literature_CNV	42
chr6:13889303-15153950	Literature_CNV	24
chr7:23876-1297908	Literature_CNV	16
chr7:15386880-15538756	Literature_CNV	20
chr7:72576596-75922729	Literature_CNV	42
chr7:83144216-86082367	Literature_CNV	40
chr7:87999366-89294562	Literature_CNV	24
chr7:121210655-121381762	Literature_CNV	40
chr7:121755766-122152424	Literature_CNV	40
chr7:128907065-128998138	Literature_CNV	20
chr7:152589804-152616097	Literature_CNV	20
chr8:6264122-6506023	Literature_CNV	20
chr8:53271330-53555369	Literature_CNV	20
chr9:7735282-7770231	Literature_CNV	20
chr9:38027602-38298598	Literature_CNV	20
chr9:102472181-136065177	Literature_CNV	464
chr10:13049365-13367445	Literature_CNV	20
chr10:46269076-50892143	Literature_CNV	64
chr10:50892146-51450787	Literature_CNV	32
chr10:84158614-89685463	Literature_CNV	178
chr11:40329226-40653822	Literature_CNV	20
chr13:23604102-24794298	Literature_CNV	23
chr13:35516457-36246870	Literature_CNV	20
chr13:48083039-48475962	Literature_CNV	20
chr13:67572852-67762297	Literature_CNV	20
chr15:20266959-25480660	Literature_CNV	123
chr15:25582397-25684125	Literature_CNV	28
chr15:73090002-76507998	Literature_CNV	44
chr15:85105976-85708062	Literature_CNV	20
chr16:2097991-2138710	Literature_CNV	20
chr16:6052837-6260813	Literature_CNV	20
chr16:14982501-16482497	Literature_CNV	64
chr16:21534307-21901307	Literature_CNV	48
chr16:21901310-22703860	Literature_CNV	34
chr16:29671216-30173786	Literature_CNV	20
chr16:82195236-82722082	Literature_CNV	40
chr17:9964035-10361280	Literature_CNV	20
chr17:14139846-15282723	Literature_CNV	23
chr17:48646233-48704540	Literature_CNV	20
chr18:32073255-35145997	Literature_CNV	42
chr19:27896698-28805250	Literature_CNV	20
chr20:127914-419869	Literature_CNV	20
chr20:2837196-4006397	Literature_CNV	23
chr20:8044044-8527513	Literature_CNV	30
chr20:41602847-41867105	Literature_CNV	20
chr21:37412682-37622182	Literature_CNV	20
chr22:18640348-21461644	Literature_CNV	51
chr22:38368320-38380536	Literature_CNV	20
chr22:47956883-49122331	Literature_CNV	36
chr22:49405478-49971756	Literature_CNV	29
chr22:51113071-51171638	Literature_CNV	36
chrX:94421-5469456	Literature_CNV	78
chrX:5808084-5999993	Literature_CNV	20
chrX:28605682-29974014	Literature_CNV	25
chrX:53300002-53699998	Literature_CNV	20
chrX:70364712-70391048	Literature_CNV	20
chrX:153213010-153399998	Literature_CNV	40
		Total = 4,492 probes*
		*Note that there is significant redundancy in this probe set, as many of the literature CNVs included on the array overlapped.

## Sheet: Table S4 Sequence SNP CNVs
CNV Source	Gain or Loss	Validation Status	Chromosome	Start Coord. (hg19)	End Coord. (hg19)	Gene(s)
SequenceSNP	Loss	PASS	chr7	93070811	93116320	CALCR MIR653 MIR489
SequenceSNP	Gain	PASS	chr14	100705631	100828134	SLC25A29 YY1 MIR345 SLC25A47 WARS
SequenceSNP	Gain	PASS	chr14	102018946	102026138	DIO3AS DIO3OS
SequenceSNP	Loss	PASS	chr14	102729881	102749930	MOK/RAGE
SequenceSNP	Gain	PASS	chr14	102973910	102975572	ANKRD9
SequenceSNP	Gain	PASS	chr15	25690465	26793077	ATP10A MIR4715 GABRB3 LOC503519 LOC100128714
SequenceSNP	Gain	PASS	chr15	27184517	27216737	GABRA5 GABRG3
SequenceSNP	Gain	PASS	chr15	28408312	28513763	HERC2
SequenceSNP	Loss	PASS	chr15	31092983	31369123	FAN1 TRPM1 MTMR10 MIR211 TRPM1
SequenceSNP	Gain/Loss	PASS	chr15	31776648	31822910	OTUD7A
SequenceSNP	Gain	PASS	chr20	32210931	32441302	NECAB3 CBFA2T2 E2F1 C20orf134 ZNF341 C20orf144 PXMP4 ZNF341 CHMP4B
SequenceSNP	Gain	No data	chr14	99640708	99642376	BCL11B
SequenceSNP	Loss	FAIL	chr3	176755900	176782811	TBL1XR1
SequenceSNP	Gain	FAIL	chr7	100159979	100456457	MOSPD3 TFR2 LOC100129845 GIGYF1 GNB2 LRCH4 ACTL6B FBXO24 PCOLCE AGFG2 SAP25 POP7 GIGF1 ZAN SLC12A9 EPHB4
SequenceSNP	Gain/Loss	FAIL	chr7	149481075	149576256	SSPO ATP6V0E2 ZNF862 LOC401431
SequenceSNP	Gain	FAIL	chr14	24507010	24550497	DHRS4L1 LRRC16B NRL CPNE6
SequenceSNP	Loss	FAIL	chr14	96758018	96777946	ATG2B
SequenceSNP	Gain	FAIL	chr14	100995537	101010301	BEGAIN WDR25
SequenceSNP	Gain	FAIL	chr14	103986349	104182224	TRMT61A CKB TRMT61A BAG5 APOPT1 C14orf153 XRCC3 KLC1 ZFYVE21
SequenceSNP	Gain	FAIL	chr15	30000877	30033536	TJP1
SequenceSNP	Gain	FAIL	chr15	40544493	40661306	C15orf56 PAK6 PLCB2 C15orf52 DISP2
SequenceSNP	Gain	FAIL	chr15	42139583	42302433	JMJD7-PLA2G4B PLA2G4B SPTBN5 EHD4 PLA2G4E
SequenceSNP	Loss	FAIL	chr15	56243611	56258744	NEDD4
SequenceSNP	Gain	FAIL	chr20	35234192	35444437	NDRG3 TGIF2-C20ORF24 C20orf24 SLA2 DSN1 KIAA0889
SequenceSNP	Gain	FAIL	chr20	57268867	57290347	NPEPL1 STX16-NPEPL1
